# Supplementary material for: A Newly Established Cuproptosis-Associated Long Non-Coding RNA Signature for Predicting Prognosis and Indicating Immune Microenvironment Features in Soft Tissue Sarcoma
Source: Hindawi journal article supplement (doi:10.1155/2022/8489387), 2022-07-06
Supplement: f1 [file 8489387.f1.pdf]

| Id        | futime | fustat | Age      | Gender | Grade  | Stage  | T      | M      | N      |
|-----------|--------|--------|----------|--------|--------|--------|--------|--------|--------|
| TCGA-K1-  | 1622   |        | 0 unknow | MALE   | unknow | unknow | unknow | unknow | unknow |
| TCGA-X6-  | 628    |        | 1 unknow | FEMALE | unknow | unknow | unknow | unknow | unknow |
| TCGA-DX   | 610    |        | 0 unknow | FEMALE | unknow | unknow | unknow | unknow | unknow |
| TCGA-DX   | 427    |        | 1 unknow | MALE   | unknow | unknow | unknow | unknow | unknow |
| TCGA-3B-  | 1521   |        | 0 unknow | MALE   | unknow | unknow | unknow | unknow | unknow |
| TCGA-DX   | 2036   |        | 0 unknow | MALE   | unknow | unknow | unknow | unknow | unknow |
| TCGA-X6-  | 938    |        | 0 unknow | FEMALE | unknow | unknow | unknow | unknow | unknow |
| TCGA-DX   | 1073   |        | 0 unknow | MALE   | unknow | unknow | unknow | unknow | unknow |
| TCGA-3B-  | 1665   |        | 0 unknow | MALE   | unknow | unknow | unknow | unknow | unknow |
| TCGA-QC   | 398    |        | 0 unknow | MALE   | unknow | unknow | unknow | unknow | unknow |
| TCGA-3B-  | 959    |        | 0 unknow | MALE   | unknow | unknow | unknow | unknow | unknow |
| TCGA-LI-, | 922    |        | 0 unknow | FEMALE | unknow | unknow | unknow | unknow | unknow |
| TCGA-PC-  | 1175   |        | 1 unknow | FEMALE | unknow | unknow | unknow | unknow | unknow |
| TCGA-DX   | 1373   |        | 0 unknow | MALE   | unknow | unknow | unknow | unknow | unknow |
| TCGA-PC-  | 550    |        | 1 unknow | FEMALE | unknow | unknow | unknow | unknow | unknow |
| TCGA-IS-, | 4845   |        | 0 unknow | FEMALE | unknow | unknow | unknow | unknow | unknow |
| TCGA-QQ   | 550    |        | 1 unknow | FEMALE | unknow | unknow | unknow | unknow | unknow |
| TCGA-DX   | 738    |        | 1 unknow | FEMALE | unknow | unknow | unknow | unknow | unknow |
| TCGA-DX   | 897    |        | 1 unknow | MALE   | unknow | unknow | unknow | unknow | unknow |
| TCGA-DX   | 295    |        | 1 unknow | MALE   | unknow | unknow | unknow | unknow | unknow |
| TCGA-DX   | 200    |        | 1 unknow | FEMALE | unknow | unknow | unknow | unknow | unknow |
| TCGA-JV-  | 499    |        | 0 unknow | FEMALE | unknow | unknow | unknow | unknow | unknow |
| TCGA-DX   | 3156   |        | 0 unknow | MALE   | unknow | unknow | unknow | unknow | unknow |
| TCGA-DX   | 284    |        | 1 unknow | MALE   | unknow | unknow | unknow | unknow | unknow |
| TCGA-FX-  | 471    |        | 0 unknow | FEMALE | unknow | unknow | unknow | unknow | unknow |
| TCGA-DX   | 296    |        | 1 unknow | MALE   | unknow | unknow | unknow | unknow | unknow |
| TCGA-DX   | 513    |        | 1 unknow | FEMALE | unknow | unknow | unknow | unknow | unknow |
| TCGA-IE-, | 819    |        | 0 unknow | FEMALE | unknow | unknow | unknow | unknow | unknow |
| TCGA-DX   | 2599   |        | 1 unknow | FEMALE | unknow | unknow | unknow | unknow | unknow |
| TCGA-3B-  | 314    |        | 0 unknow | MALE   | unknow | unknow | unknow | unknow | unknow |
| TCGA-DX   | 2324   |        | 1 unknow | MALE   | unknow | unknow | unknow | unknow | unknow |
| TCGA-DX   | 2034   |        | 1 unknow | FEMALE | unknow | unknow | unknow | unknow | unknow |
| TCGA-K1-  | 1891   |        | 0 unknow | FEMALE | unknow | unknow | unknow | unknow | unknow |
| TCGA-FX-  | 618    |        | 0 unknow | MALE   | unknow | unknow | unknow | unknow | unknow |
| TCGA-SI-, | 771    |        | 0 unknow | MALE   | unknow | unknow | unknow | unknow | unknow |
| TCGA-IW-  | 180    |        | 1 unknow | FEMALE | unknow | unknow | unknow | unknow | unknow |
| TCGA-DX   | 1240   |        | 0 unknow | FEMALE | unknow | unknow | unknow | unknow | unknow |
| TCGA-KD-  | 1073   |        | 1 unknow | FEMALE | unknow | unknow | unknow | unknow | unknow |
| TCGA-X9-  | 1108   |        | 0 unknow | MALE   | unknow | unknow | unknow | unknow | unknow |
| TCGA-HS-  | 22     |        | 1 unknow | FEMALE | unknow | unknow | unknow | unknow | unknow |
| TCGA-DX   | 138    |        | 1 unknow | MALE   | unknow | unknow | unknow | unknow | unknow |
| TCGA-DX   | 365    |        | 0 unknow | FEMALE | unknow | unknow | unknow | unknow | unknow |
| TCGA-IE-, | 594    |        | 0 unknow | FEMALE | unknow | unknow | unknow | unknow | unknow |
| TCGA-IS-, | 413    |        | 1 unknow | FEMALE | unknow | unknow | unknow | unknow | unknow |
| TCGA-X6-  | 1067   |        | 1 unknow | MALE   | unknow | unknow | unknow | unknow | unknow |
| TCGA-DX   | 1552   |        | 1 unknow | MALE   | unknow | unknow | unknow | unknow | unknow |
| TCGA-K1-  | 3765   |        | 0 unknow | FEMALE | unknow | unknow | unknow | unknow | unknow |
| TCGA-VT-  | 379    |        | 0 unknow | MALE   | unknow | unknow | unknow | unknow | unknow |
| TCGA-DX   | 1536   |        | 1 unknow | MALE   | unknow | unknow | unknow | unknow | unknow |
| TCGA-DX   | 1055   |        | 0 unknow | MALE   | unknow | unknow | unknow | unknow | unknow |
| TCGA-DX   | 280    |        | 0 unknow | FEMALE | unknow | unknow | unknow | unknow | unknow |
| TCGA-DX   | 1548   |        | 0 unknow | FEMALE | unknow | unknow | unknow | unknow | unknow |
| TCGA-DX   | 2085   |        | 0 unknow | FEMALE | unknow | unknow | unknow | unknow | unknow |
| TCGA-DX   | 1230   |        | 0 unknow | FEMALE | unknow | unknow | unknow | unknow | unknow |
| TCGA-DX   | 1400   |        | 0 unknow | FEMALE | unknow | unknow | unknow | unknow | unknow |
| TCGA-MC   | 318    |        | 1 unknow | FEMALE | unknow | unknow | unknow | unknow | unknow |
| TCGA-DX   | 2381   |        | 0 unknow | MALE   | unknow | unknow | unknow | unknow | unknow |
| TCGA-IS-, | 858    |        | 1 unknow | FEMALE | unknow | unknow | unknow | unknow | unknow |

|           |      |          |        |        |        |        |        |        |
|-----------|------|----------|--------|--------|--------|--------|--------|--------|
| TCGA-DX   | 1399 | 0 unknow | MALE   | unknow | unknow | unknow | unknow | unknow |
| TCGA-IW-  | 688  | 0 unknow | FEMALE | unknow | unknow | unknow | unknow | unknow |
| TCGA-HS-  | 1585 | 0 unknow | FEMALE | unknow | unknow | unknow | unknow | unknow |
| TCGA-DX   | 191  | 1 unknow | MALE   | unknow | unknow | unknow | unknow | unknow |
| TCGA-MB   | 773  | 0 unknow | FEMALE | unknow | unknow | unknow | unknow | unknow |
| TCGA-HB-  | 384  | 1 unknow | FEMALE | unknow | unknow | unknow | unknow | unknow |
| TCGA-DX   | 969  | 0 unknow | MALE   | unknow | unknow | unknow | unknow | unknow |
| TCGA-VT-  | 796  | 0 unknow | FEMALE | unknow | unknow | unknow | unknow | unknow |
| TCGA-SI-, | 694  | 1 unknow | MALE   | unknow | unknow | unknow | unknow | unknow |
| TCGA-FX-  | 505  | 0 unknow | MALE   | unknow | unknow | unknow | unknow | unknow |
| TCGA-FX-  | 1495 | 0 unknow | FEMALE | unknow | unknow | unknow | unknow | unknow |
| TCGA-DX   | 1359 | 0 unknow | MALE   | unknow | unknow | unknow | unknow | unknow |
| TCGA-QC   | 3406 | 0 unknow | MALE   | unknow | unknow | unknow | unknow | unknow |
| TCGA-DX   | 1092 | 0 unknow | FEMALE | unknow | unknow | unknow | unknow | unknow |
| TCGA-DX   | 2044 | 0 unknow | FEMALE | unknow | unknow | unknow | unknow | unknow |
| TCGA-IE-, | 2448 | 1 unknow | MALE   | unknow | unknow | unknow | unknow | unknow |
| TCGA-WK   | 146  | 1 unknow | MALE   | unknow | unknow | unknow | unknow | unknow |
| TCGA-DX   | 1020 | 1 unknow | FEMALE | unknow | unknow | unknow | unknow | unknow |
| TCGA-FX-  | 245  | 1 unknow | FEMALE | unknow | unknow | unknow | unknow | unknow |
| TCGA-DX   | 485  | 1 unknow | MALE   | unknow | unknow | unknow | unknow | unknow |
| TCGA-DX   | 928  | 0 unknow | MALE   | unknow | unknow | unknow | unknow | unknow |
| TCGA-DX   | 325  | 1 unknow | FEMALE | unknow | unknow | unknow | unknow | unknow |
| TCGA-WP   | 261  | 1 unknow | FEMALE | unknow | unknow | unknow | unknow | unknow |
| TCGA-DX   | 1579 | 0 unknow | MALE   | unknow | unknow | unknow | unknow | unknow |
| TCGA-DX   | 4573 | 0 unknow | FEMALE | unknow | unknow | unknow | unknow | unknow |
| TCGA-DX   | 1105 | 0 unknow | MALE   | unknow | unknow | unknow | unknow | unknow |
| TCGA-WK   | 363  | 1 unknow | FEMALE | unknow | unknow | unknow | unknow | unknow |
| TCGA-3B-  | 808  | 0 unknow | MALE   | unknow | unknow | unknow | unknow | unknow |
| TCGA-DX   | 2408 | 0 unknow | MALE   | unknow | unknow | unknow | unknow | unknow |
| TCGA-MJ-  | 456  | 0 unknow | FEMALE | unknow | unknow | unknow | unknow | unknow |
| TCGA-DX   | 1534 | 0 unknow | MALE   | unknow | unknow | unknow | unknow | unknow |
| TCGA-DX   | 2007 | 0 unknow | MALE   | unknow | unknow | unknow | unknow | unknow |
| TCGA-DX   | 3238 | 0 unknow | FEMALE | unknow | unknow | unknow | unknow | unknow |
| TCGA-IE-, | 42   | 0 unknow | MALE   | unknow | unknow | unknow | unknow | unknow |
| TCGA-DX   | 1247 | 0 unknow | MALE   | unknow | unknow | unknow | unknow | unknow |
| TCGA-DX   | 1372 | 0 unknow | MALE   | unknow | unknow | unknow | unknow | unknow |
| TCGA-DX   | 2619 | 0 unknow | FEMALE | unknow | unknow | unknow | unknow | unknow |
| TCGA-QC   | 537  | 0 unknow | FEMALE | unknow | unknow | unknow | unknow | unknow |
| TCGA-FX-  | 605  | 1 unknow | FEMALE | unknow | unknow | unknow | unknow | unknow |
| TCGA-X6-  | 583  | 0 unknow | FEMALE | unknow | unknow | unknow | unknow | unknow |
| TCGA-DX   | 93   | 1 unknow | FEMALE | unknow | unknow | unknow | unknow | unknow |
| TCGA-DX   | 463  | 0 unknow | MALE   | unknow | unknow | unknow | unknow | unknow |
| TCGA-DX   | 2247 | 0 unknow | MALE   | unknow | unknow | unknow | unknow | unknow |
| TCGA-QC   | 1478 | 1 unknow | FEMALE | unknow | unknow | unknow | unknow | unknow |
| TCGA-DX   | 275  | 1 unknow | FEMALE | unknow | unknow | unknow | unknow | unknow |
| TCGA-N1-  | 224  | 1 unknow | FEMALE | unknow | unknow | unknow | unknow | unknow |
| TCGA-DX   | 456  | 1 unknow | MALE   | unknow | unknow | unknow | unknow | unknow |
| TCGA-DX   | 1885 | 0 unknow | FEMALE | unknow | unknow | unknow | unknow | unknow |
| TCGA-DX   | 995  | 1 unknow | MALE   | unknow | unknow | unknow | unknow | unknow |
| TCGA-WK   | 1722 | 1 unknow | FEMALE | unknow | unknow | unknow | unknow | unknow |
| TCGA-3B-  | 2694 | 1 unknow | FEMALE | unknow | unknow | unknow | unknow | unknow |
| TCGA-WK   | 1164 | 1 unknow | MALE   | unknow | unknow | unknow | unknow | unknow |
| TCGA-X6-  | 0    | 0 unknow | FEMALE | unknow | unknow | unknow | unknow | unknow |
| TCGA-3B-  | 1096 | 0 unknow | MALE   | unknow | unknow | unknow | unknow | unknow |
| TCGA-MJ-  | 681  | 0 unknow | MALE   | unknow | unknow | unknow | unknow | unknow |
| TCGA-WK   | 2579 | 0 unknow | FEMALE | unknow | unknow | unknow | unknow | unknow |
| TCGA-DX   | 1116 | 1 unknow | MALE   | unknow | unknow | unknow | unknow | unknow |
| TCGA-IF-, | 767  | 1 unknow | MALE   | unknow | unknow | unknow | unknow | unknow |
| TCGA-3R-  | 17   | 1 unknow | MALE   | unknow | unknow | unknow | unknow | unknow |

|           |      |          |        |        |        |        |        |        |
|-----------|------|----------|--------|--------|--------|--------|--------|--------|
| TCGA-3B-  | 1366 | 1 unknow | MALE   | unknow | unknow | unknow | unknow | unknow |
| TCGA-SG-  | 576  | 0 unknow | MALE   | unknow | unknow | unknow | unknow | unknow |
| TCGA-X6-  | 1070 | 0 unknow | MALE   | unknow | unknow | unknow | unknow | unknow |
| TCGA-X6-  | 24   | 1 unknow | MALE   | unknow | unknow | unknow | unknow | unknow |
| TCGA-QQ   | 3964 | 0 unknow | MALE   | unknow | unknow | unknow | unknow | unknow |
| TCGA-DX   | 1456 | 0 unknow | MALE   | unknow | unknow | unknow | unknow | unknow |
| TCGA-DX   | 2830 | 0 unknow | FEMALE | unknow | unknow | unknow | unknow | unknow |
| TCGA-QQ   | 1092 | 0 unknow | FEMALE | unknow | unknow | unknow | unknow | unknow |
| TCGA-DX   | 160  | 1 unknow | FEMALE | unknow | unknow | unknow | unknow | unknow |
| TCGA-FX-  | 660  | 0 unknow | FEMALE | unknow | unknow | unknow | unknow | unknow |
| TCGA-DX   | 1088 | 1 unknow | FEMALE | unknow | unknow | unknow | unknow | unknow |
| TCGA-DX   | 35   | 1 unknow | MALE   | unknow | unknow | unknow | unknow | unknow |
| TCGA-QQ   | 1129 | 0 unknow | MALE   | unknow | unknow | unknow | unknow | unknow |
| TCGA-DX   | 821  | 0 unknow | MALE   | unknow | unknow | unknow | unknow | unknow |
| TCGA-DX   | 3310 | 0 unknow | MALE   | unknow | unknow | unknow | unknow | unknow |
| TCGA-UE-  | 0    | 0 unknow | FEMALE | unknow | unknow | unknow | unknow | unknow |
| TCGA-DX   | 1492 | 0 unknow | MALE   | unknow | unknow | unknow | unknow | unknow |
| TCGA-DX   | 1143 | 0 unknow | MALE   | unknow | unknow | unknow | unknow | unknow |
| TCGA-DX   | 564  | 1 unknow | MALE   | unknow | unknow | unknow | unknow | unknow |
| TCGA-VT-  | 326  | 0 unknow | MALE   | unknow | unknow | unknow | unknow | unknow |
| TCGA-DX   | 695  | 1 unknow | FEMALE | unknow | unknow | unknow | unknow | unknow |
| TCGA-MC   | 352  | 0 unknow | FEMALE | unknow | unknow | unknow | unknow | unknow |
| TCGA-DX   | 482  | 0 unknow | FEMALE | unknow | unknow | unknow | unknow | unknow |
| TCGA-HB   | 139  | 1 unknow | MALE   | unknow | unknow | unknow | unknow | unknow |
| TCGA-MB   | 15   | 0 unknow | MALE   | unknow | unknow | unknow | unknow | unknow |
| TCGA-QQ   | 5723 | 0 unknow | FEMALE | unknow | unknow | unknow | unknow | unknow |
| TCGA-X9-  | 831  | 0 unknow | FEMALE | unknow | unknow | unknow | unknow | unknow |
| TCGA-DX   | 1649 | 1 unknow | MALE   | unknow | unknow | unknow | unknow | unknow |
| TCGA-X6-  | 550  | 1 unknow | FEMALE | unknow | unknow | unknow | unknow | unknow |
| TCGA-DX   | 4627 | 0 unknow | FEMALE | unknow | unknow | unknow | unknow | unknow |
| TCGA-WK   | 688  | 1 unknow | FEMALE | unknow | unknow | unknow | unknow | unknow |
| TCGA-HS-  | 1013 | 0 unknow | FEMALE | unknow | unknow | unknow | unknow | unknow |
| TCGA-PT-  | 813  | 0 unknow | FEMALE | unknow | unknow | unknow | unknow | unknow |
| TCGA-K1-  | 711  | 1 unknow | FEMALE | unknow | unknow | unknow | unknow | unknow |
| TCGA-DX   | 570  | 1 unknow | FEMALE | unknow | unknow | unknow | unknow | unknow |
| TCGA-RN   | 22   | 0 unknow | FEMALE | unknow | unknow | unknow | unknow | unknow |
| TCGA-SG-  | 118  | 1 unknow | FEMALE | unknow | unknow | unknow | unknow | unknow |
| TCGA-MJ-  | 547  | 0 unknow | FEMALE | unknow | unknow | unknow | unknow | unknow |
| TCGA-DX   | 2515 | 0 unknow | FEMALE | unknow | unknow | unknow | unknow | unknow |
| TCGA-MB   | 0    | 0 unknow | MALE   | unknow | unknow | unknow | unknow | unknow |
| TCGA-DX   | 439  | 1 unknow | MALE   | unknow | unknow | unknow | unknow | unknow |
| TCGA-DX   | 2901 | 0 unknow | MALE   | unknow | unknow | unknow | unknow | unknow |
| TCGA-DX   | 850  | 1 unknow | FEMALE | unknow | unknow | unknow | unknow | unknow |
| TCGA-FX-  | 947  | 0 unknow | MALE   | unknow | unknow | unknow | unknow | unknow |
| TCGA-IE-, | 98   | 0 unknow | FEMALE | unknow | unknow | unknow | unknow | unknow |
| TCGA-JV-  | 119  | 1 unknow | FEMALE | unknow | unknow | unknow | unknow | unknow |
| TCGA-MB   | 661  | 0 unknow | MALE   | unknow | unknow | unknow | unknow | unknow |
| TCGA-HB   | 2057 | 0 unknow | FEMALE | unknow | unknow | unknow | unknow | unknow |
| TCGA-JV-  | 32   | 1 unknow | FEMALE | unknow | unknow | unknow | unknow | unknow |
| TCGA-DX   | 1834 | 0 unknow | MALE   | unknow | unknow | unknow | unknow | unknow |
| TCGA-DX   | 1820 | 0 unknow | MALE   | unknow | unknow | unknow | unknow | unknow |
| TCGA-DX   | 541  | 0 unknow | MALE   | unknow | unknow | unknow | unknow | unknow |
| TCGA-QQ   | 1970 | 1 unknow | MALE   | unknow | unknow | unknow | unknow | unknow |
| TCGA-IW-  | 2615 | 0 unknow | FEMALE | unknow | unknow | unknow | unknow | unknow |
| TCGA-X6-  | 896  | 0 unknow | FEMALE | unknow | unknow | unknow | unknow | unknow |
| TCGA-DX   | 972  | 0 unknow | FEMALE | unknow | unknow | unknow | unknow | unknow |
| TCGA-PC-  | 3740 | 0 unknow | MALE   | unknow | unknow | unknow | unknow | unknow |
| TCGA-HB   | 1126 | 0 unknow | FEMALE | unknow | unknow | unknow | unknow | unknow |
| TCGA-DX   | 2087 | 0 unknow | FEMALE | unknow | unknow | unknow | unknow | unknow |

|           |      |          |        |        |        |        |        |        |
|-----------|------|----------|--------|--------|--------|--------|--------|--------|
| TCGA-K1-  | 3080 | 0 unknow | FEMALE | unknow | unknow | unknow | unknow | unknow |
| TCGA-DX   | 2271 | 0 unknow | FEMALE | unknow | unknow | unknow | unknow | unknow |
| TCGA-DX   | 846  | 1 unknow | MALE   | unknow | unknow | unknow | unknow | unknow |
| TCGA-DX   | 2291 | 0 unknow | FEMALE | unknow | unknow | unknow | unknow | unknow |
| TCGA-DX   | 1121 | 0 unknow | MALE   | unknow | unknow | unknow | unknow | unknow |
| TCGA-MB   | 600  | 0 unknow | FEMALE | unknow | unknow | unknow | unknow | unknow |
| TCGA-DX   | 1168 | 1 unknow | MALE   | unknow | unknow | unknow | unknow | unknow |
| TCGA-IF-, | 1590 | 0 unknow | FEMALE | unknow | unknow | unknow | unknow | unknow |
| TCGA-3B-  | 599  | 1 unknow | MALE   | unknow | unknow | unknow | unknow | unknow |
| TCGA-DX   | 1466 | 1 unknow | MALE   | unknow | unknow | unknow | unknow | unknow |
| TCGA-HS-  | 298  | 0 unknow | FEMALE | unknow | unknow | unknow | unknow | unknow |
| TCGA-DX   | 1845 | 1 unknow | MALE   | unknow | unknow | unknow | unknow | unknow |
| TCGA-3B-  | 768  | 0 unknow | FEMALE | unknow | unknow | unknow | unknow | unknow |
| TCGA-X6-  | 1547 | 0 unknow | FEMALE | unknow | unknow | unknow | unknow | unknow |
| TCGA-DX   | 923  | 0 unknow | FEMALE | unknow | unknow | unknow | unknow | unknow |
| TCGA-WK   | 1991 | 1 unknow | FEMALE | unknow | unknow | unknow | unknow | unknow |
| TCGA-DX   | 591  | 1 unknow | MALE   | unknow | unknow | unknow | unknow | unknow |
| TCGA-Z4-  | 485  | 0 unknow | FEMALE | unknow | unknow | unknow | unknow | unknow |
| TCGA-X2-  | 1927 | 0 unknow | FEMALE | unknow | unknow | unknow | unknow | unknow |
| TCGA-DX   | 2575 | 1 unknow | FEMALE | unknow | unknow | unknow | unknow | unknow |
| TCGA-PC-  | 2464 | 1 unknow | FEMALE | unknow | unknow | unknow | unknow | unknow |
| TCGA-PC-  | 193  | 1 unknow | MALE   | unknow | unknow | unknow | unknow | unknow |
| TCGA-QQ   | 56   | 0 unknow | MALE   | unknow | unknow | unknow | unknow | unknow |
| TCGA-SI-, | 262  | 1 unknow | FEMALE | unknow | unknow | unknow | unknow | unknow |
| TCGA-DX   | 1161 | 0 unknow | FEMALE | unknow | unknow | unknow | unknow | unknow |
| TCGA-DX   | 721  | 0 unknow | FEMALE | unknow | unknow | unknow | unknow | unknow |
| TCGA-DX   | 1045 | 0 unknow | FEMALE | unknow | unknow | unknow | unknow | unknow |
| TCGA-DX   | 3102 | 0 unknow | MALE   | unknow | unknow | unknow | unknow | unknow |
| TCGA-DX   | 492  | 1 unknow | FEMALE | unknow | unknow | unknow | unknow | unknow |
| TCGA-WK   | 1262 | 1 unknow | FEMALE | unknow | unknow | unknow | unknow | unknow |
| TCGA-QQ   | 320  | 1 unknow | FEMALE | unknow | unknow | unknow | unknow | unknow |
| TCGA-SI-, | 996  | 0 unknow | FEMALE | unknow | unknow | unknow | unknow | unknow |
| TCGA-UE-  | 402  | 0 unknow | FEMALE | unknow | unknow | unknow | unknow | unknow |
| TCGA-DX   | 1138 | 0 unknow | FEMALE | unknow | unknow | unknow | unknow | unknow |
| TCGA-DX   | 2030 | 0 unknow | FEMALE | unknow | unknow | unknow | unknow | unknow |
| TCGA-IF-, | 1129 | 1 unknow | FEMALE | unknow | unknow | unknow | unknow | unknow |
| TCGA-3B-  | 567  | 1 unknow | FEMALE | unknow | unknow | unknow | unknow | unknow |
| TCGA-DX   | 2169 | 0 unknow | MALE   | unknow | unknow | unknow | unknow | unknow |
| TCGA-QQ   | 1424 | 1 unknow | MALE   | unknow | unknow | unknow | unknow | unknow |
| TCGA-KD-  | 1941 | 1 unknow | FEMALE | unknow | unknow | unknow | unknow | unknow |
| TCGA-DX   | 391  | 1 unknow | MALE   | unknow | unknow | unknow | unknow | unknow |
| TCGA-DX   | 2586 | 0 unknow | MALE   | unknow | unknow | unknow | unknow | unknow |
| TCGA-DX   | 478  | 0 unknow | MALE   | unknow | unknow | unknow | unknow | unknow |
| TCGA-LI-, | 540  | 1 unknow | FEMALE | unknow | unknow | unknow | unknow | unknow |
| TCGA-DX   | 1892 | 0 unknow | MALE   | unknow | unknow | unknow | unknow | unknow |
| TCGA-DX   | 1235 | 1 unknow | FEMALE | unknow | unknow | unknow | unknow | unknow |
| TCGA-3B-  | 1104 | 0 unknow | MALE   | unknow | unknow | unknow | unknow | unknow |
| TCGA-DX   | 881  | 0 unknow | MALE   | unknow | unknow | unknow | unknow | unknow |
| TCGA-DX   | 404  | 1 unknow | FEMALE | unknow | unknow | unknow | unknow | unknow |
| TCGA-Z4-  | 407  | 0 unknow | MALE   | unknow | unknow | unknow | unknow | unknow |
| TCGA-DX   | 261  | 0 unknow | MALE   | unknow | unknow | unknow | unknow | unknow |
| TCGA-DX   | 805  | 0 unknow | MALE   | unknow | unknow | unknow | unknow | unknow |
| TCGA-SI-, | 597  | 0 unknow | FEMALE | unknow | unknow | unknow | unknow | unknow |
| TCGA-KD-  | 499  | 0 unknow | FEMALE | unknow | unknow | unknow | unknow | unknow |
| TCGA-SG-  | 533  | 0 unknow | MALE   | unknow | unknow | unknow | unknow | unknow |
| TCGA-DX   | 1953 | 1 unknow | FEMALE | unknow | unknow | unknow | unknow | unknow |
| TCGA-IE-, | 605  | 0 unknow | FEMALE | unknow | unknow | unknow | unknow | unknow |
| TCGA-DX   | 367  | 1 unknow | MALE   | unknow | unknow | unknow | unknow | unknow |
| TCGA-IS-, | 5204 | 0 unknow | FEMALE | unknow | unknow | unknow | unknow | unknow |

|          |      |          |        |        |        |        |        |        |
|----------|------|----------|--------|--------|--------|--------|--------|--------|
| TCGA-DX  | 1049 | 1 unknow | FEMALE | unknow | unknow | unknow | unknow | unknow |
| TCGA-3B- | 1627 | 1 unknow | FEMALE | unknow | unknow | unknow | unknow | unknow |
| TCGA-K1- | 158  | 0 unknow | MALE   | unknow | unknow | unknow | unknow | unknow |
| TCGA-3B- | 437  | 1 unknow | FEMALE | unknow | unknow | unknow | unknow | unknow |
| TCGA-RN  | 510  | 0 unknow | MALE   | unknow | unknow | unknow | unknow | unknow |
| TCGA-DX  | 428  | 0 unknow | MALE   | unknow | unknow | unknow | unknow | unknow |
| TCGA-DX  | 4150 | 0 unknow | MALE   | unknow | unknow | unknow | unknow | unknow |
| TCGA-DX  | 978  | 1 unknow | MALE   | unknow | unknow | unknow | unknow | unknow |
| TCGA-DX  | 1061 | 1 unknow | FEMALE | unknow | unknow | unknow | unknow | unknow |
| TCGA-KF- | 356  | 0 unknow | FEMALE | unknow | unknow | unknow | unknow | unknow |
| TCGA-DX  | 1605 | 0 unknow | FEMALE | unknow | unknow | unknow | unknow | unknow |
| TCGA-3B- | 1303 | 0 unknow | FEMALE | unknow | unknow | unknow | unknow | unknow |
| TCGA-K1- | 528  | 0 unknow | MALE   | unknow | unknow | unknow | unknow | unknow |
| TCGA-X6- | 1379 | 0 unknow | MALE   | unknow | unknow | unknow | unknow | unknow |
| TCGA-DX  | 2641 | 0 unknow | MALE   | unknow | unknow | unknow | unknow | unknow |
| TCGA-DX  | 1017 | 0 unknow | MALE   | unknow | unknow | unknow | unknow | unknow |
| TCGA-HB- | 1061 | 1 unknow | FEMALE | unknow | unknow | unknow | unknow | unknow |
| TCGA-DX  | 546  | 0 unknow | FEMALE | unknow | unknow | unknow | unknow | unknow |
| TCGA-QC  | 637  | 0 unknow | MALE   | unknow | unknow | unknow | unknow | unknow |
| TCGA-DX  | 2625 | 0 unknow | MALE   | unknow | unknow | unknow | unknow | unknow |
| TCGA-PC- | 1142 | 1 unknow | MALE   | unknow | unknow | unknow | unknow | unknow |
| TCGA-3B- | 1170 | 0 unknow | MALE   | unknow | unknow | unknow | unknow | unknow |
| TCGA-3B- | 2085 | 0 unknow | FEMALE | unknow | unknow | unknow | unknow | unknow |
| TCGA-Z4- | 133  | 0 unknow | FEMALE | unknow | unknow | unknow | unknow | unknow |
| TCGA-DX  | 2369 | 0 unknow | FEMALE | unknow | unknow | unknow | unknow | unknow |
| TCGA-Z4- | 486  | 0 unknow | FEMALE | unknow | unknow | unknow | unknow | unknow |
